# Supplementary material for: Germline Profiling and Molecular Characterization of Early Onset Metastatic Colorectal Cancer
Source: PubMed Central journal article supplement (PMC7604404; doi:10.3389/fonc.2020.568911), 2020-10-19
Supplement: Presentation_1.pdf [file Presentation_1.pdf]

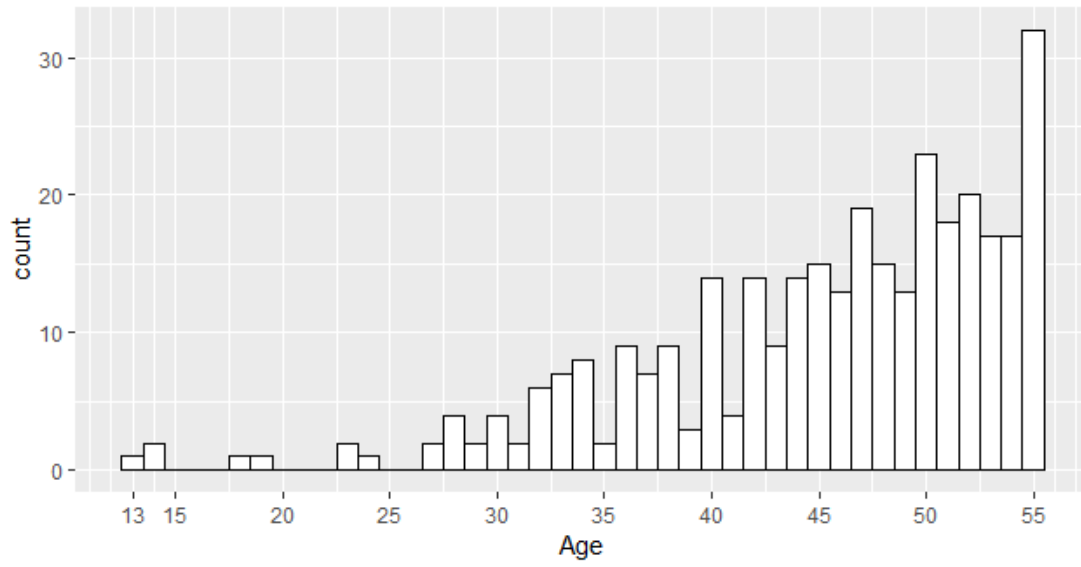

Figure S1 Age distribution of 330 EO mCRC

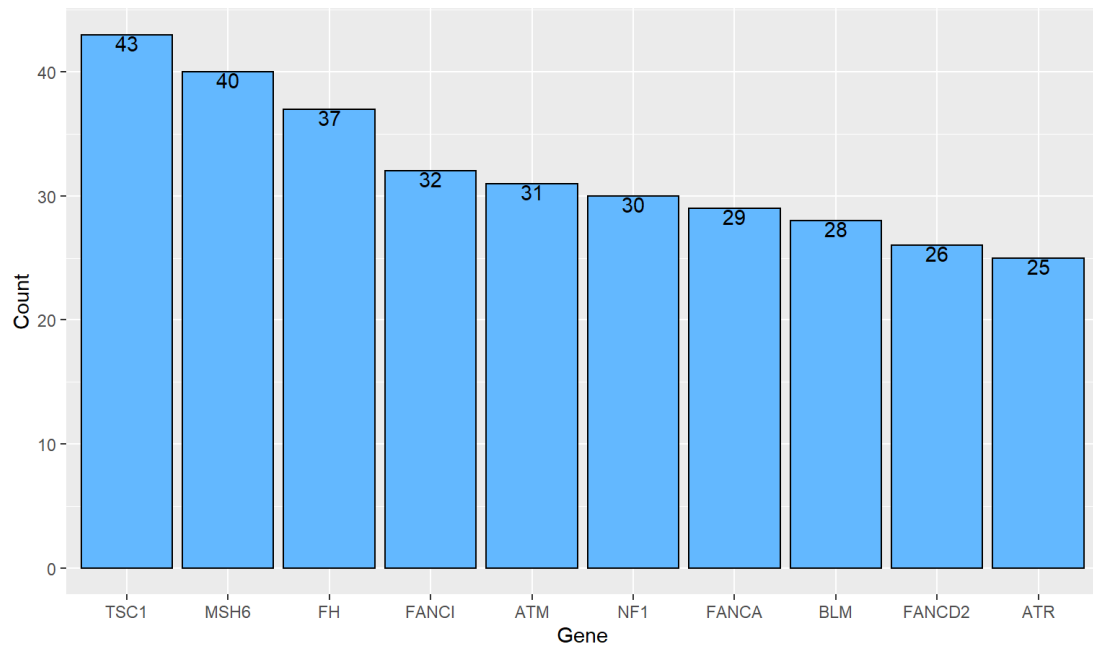

Figure S2 Top 10 VUS genes identified in 330 EO CRC patients
